# Supplementary material for: Palindromic amplification of the ERBB2 oncogene in primary HER2-positive breast tumors
Source: PubMed Central journal article supplement (PMC5314454; doi:10.1038/srep41921), 2017-02-17
Supplement: srep41921-s1.pdf [file srep41921-s1.pdf]

## Supplemental Figures Table of Contents

Palindromic amplification of the *ERBB2* oncogene in human primary breast tumors

Michael Marotta<sup>1,5</sup>, Taku Onodera<sup>3,5</sup>, Jeffrey Johnson<sup>4</sup>, Thomas Budd<sup>2</sup>, Takaaki Watanabe<sup>1,4</sup>,  
Xiaojiang Cui<sup>4</sup>, Armando Giuliano<sup>4</sup>, Atsushi Niida<sup>3</sup> and Hisashi Tanaka<sup>1,4</sup>

- Figure 1      A common pattern of copy number transition of chromosome 17 in HER2-positive breast tumors
- Figure 2      Procedure of GAPF-seq
- Figure 3      Local genomic environment of the region surrounding *ERBB2* gene
- Figure 4      Copy number alterations of chromosome 17 in HER2-positive breast cancer
- Figure 5      Mechanisms for generating a hairpin-capped chromosome 17 (model)

Supplementary Figure 1 - Marotta *et al*,

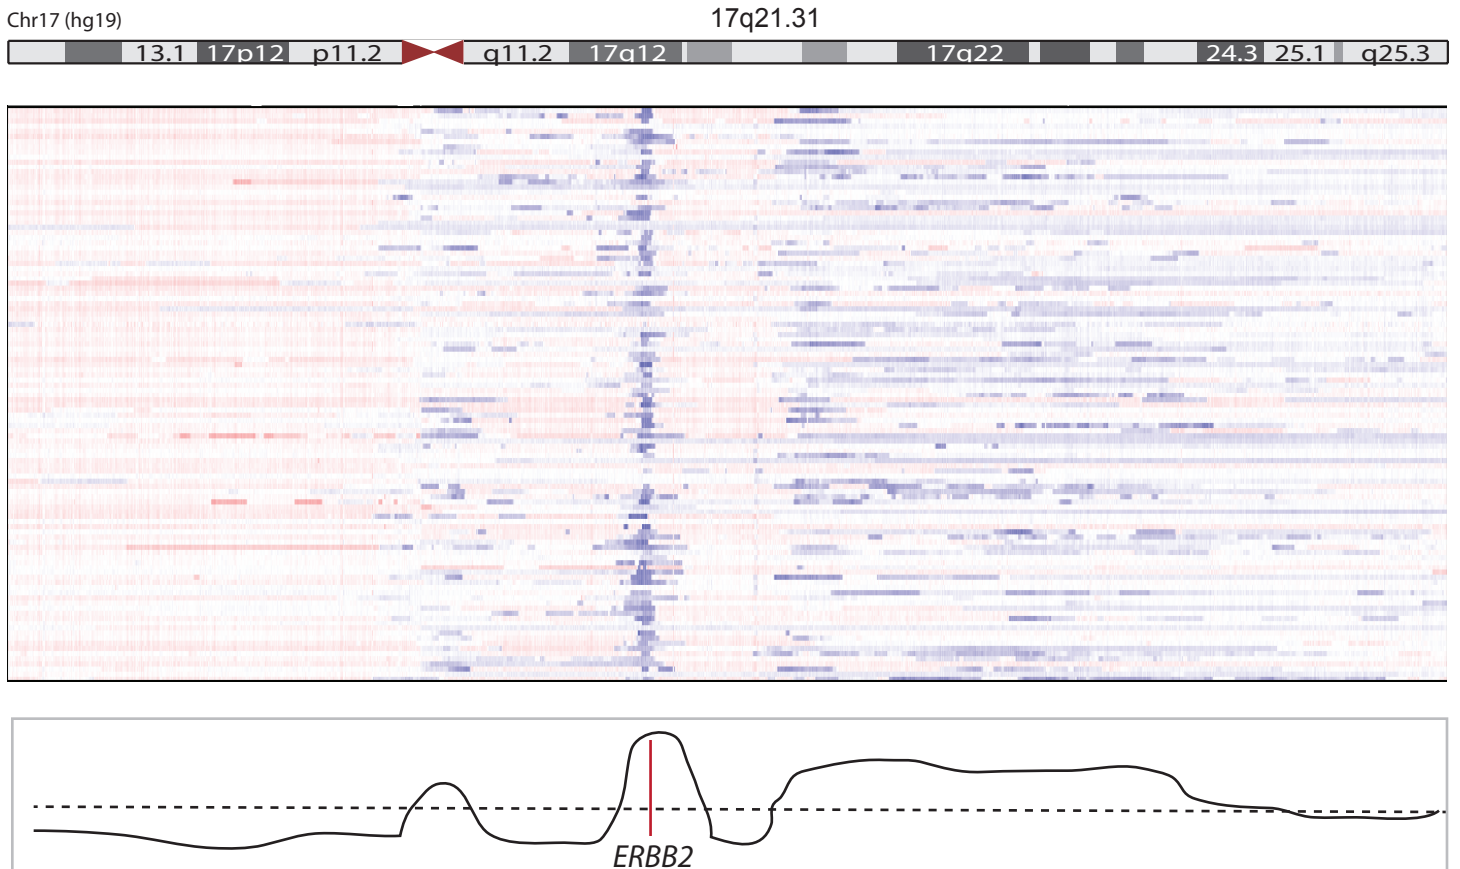

A common pattern of copy number transition of chromosome 17 in HER2-positive breast tumors  
A heat map showing the copy number alterations in 117 HER2-positive breast tumors. Blue indicates genomic regions with copy-number gains and red indicates regions with copy-number loss.

Supplementary Figure 2 - Marotta *et al*,

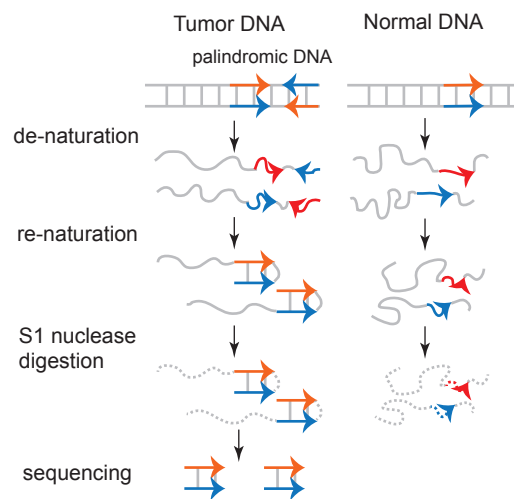

Procedure for enriching palindromic DNA from tumor genomic DNA. Palindromic DNA is shown by the pair of a blue and a red arrow that are complementary to each other. After denaturation and quick renaturation, palindromic DNA become double-stranded (dsDNA), while non-palindromic DNA remains single-stranded (ssDNA). Single-stranded nucleic acid specific nuclease S1 digests ssDNA, but not dsDNA. Thus the treatment by S1 results in the enrichment of DNA that derives from palindromic DNA.



Supplementary Figure 4 - Marotta *et al*,

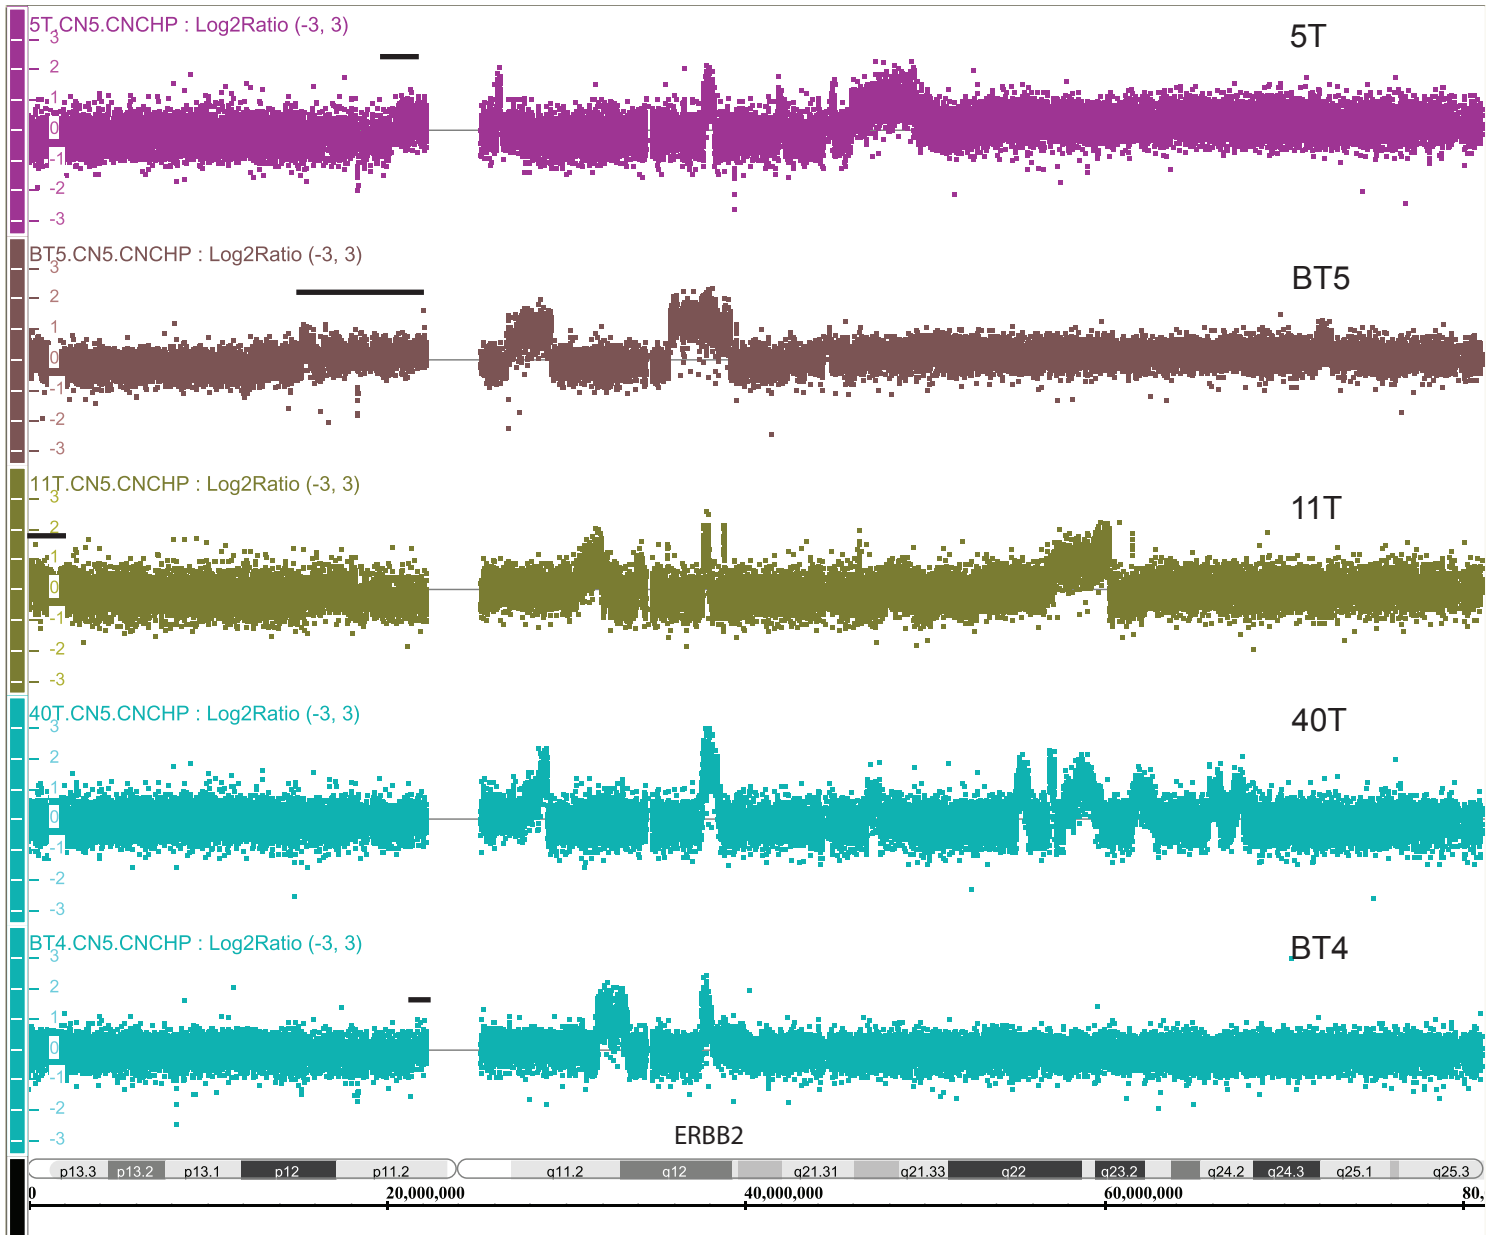

Copy number alterations of chromosome 17 in 5 HER2-positive breast tumors. The location of ERBB2 amplicon is shown on the chromatograph. The regions on the 17p that retain copy numbers are indicated by black lines.

Supplementary Figure 5 - Marotta *et al*,

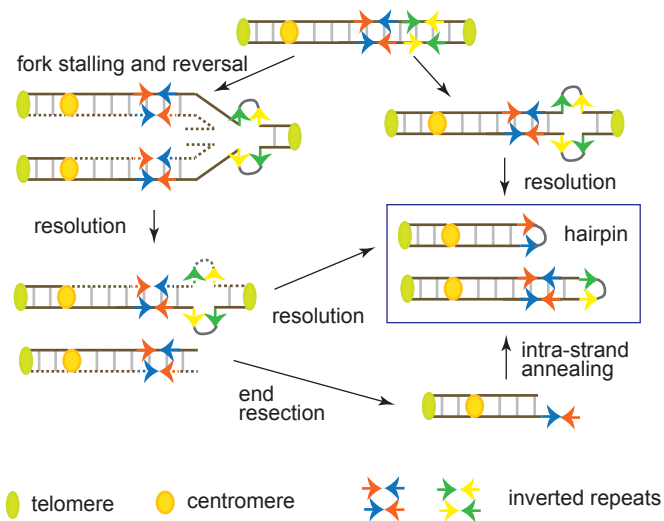

Inverted repeats-guided formation of a hairpin-capped chromosome (model). Replication forks stall at the inverted repeat (left). Fork reversal creates a four-way junction, the resolution of which results in a one-ended DSB. Processing of the end and intra-strand annealing lead to the formation of a hairpin-capped chromosome. Alternatively, a cruciform structure formed by the intra-strand annealing is resolved to form a hairpin-capped chromosome (right).
